# Supplementary material for: Chemical Constituents of Thesium chinense Turcz and Their In Vitro Antioxidant, Anti-Inflammatory and Cytotoxic Activities
Source: MDPI journal article supplement (doi:10.3390/molecules28062685), 2023-03-16
Supplement: s1 [file s1]

## SUPPLEMENTARY MATERIAL

### Chemical constituents of *Thesium chinense* Turcz and their in vitro antioxidant, anti-inflammatory and cytotoxic activities

Zhen-Zhen Liu, Jun-Cheng Ma, Peng Deng, Fu-Cai Ren\*, Ning Li\*

Inflammation and Immune Mediated Diseases Laboratory of Anhui Province, School  
of Pharmacy, Anhui Medical University, Hefei, 230032, China

### Content

|                                                                                         |   |
|-----------------------------------------------------------------------------------------|---|
| <b>Fig. S1.</b> The <sup>1</sup> H NMR spectrum of compound <b>1</b> .....              | 1 |
| <b>Fig. S2.</b> The <sup>3</sup> C-DEPT-135 spectrum of compound <b>1</b> .....         | 1 |
| <b>Fig. S3.</b> The <sup>13</sup> C NMR spectrum of compound <b>1</b> .....             | 1 |
| <b>Fig. S4.</b> The HSQC spectrum of compound <b>1</b> .....                            | 2 |
| <b>Fig. S5.</b> The HMBC spectrum of compound <b>1</b> .....                            | 2 |
| <b>Fig. S6.</b> <sup>1</sup> H- <sup>1</sup> H COSY spectrum of compound <b>1</b> ..... | 3 |
| <b>Fig. S7.</b> The NOESY spectrum of compound <b>1</b> .....                           | 3 |
| <b>Fig. S8.</b> The MS-ESI spectrum of compound <b>1</b> .....                          | 4 |
| <b>Fig. S9.</b> The HRMS-ESI spectrum of compound <b>1</b> .....                        | 4 |
| <b>Fig. S10.</b> The IR spectrum of compound <b>1</b> .....                             | 5 |
| <b>Fig. S11.</b> The UV spectrum of compound <b>1</b> .....                             | 5 |
| <b>Fig. S12.</b> The rotation spectrum of compound <b>1</b> .....                       | 5 |
| <b>Table S1.</b> “GIAO” method results of <b>1a</b> and <b>1b</b> .....                 | 6 |
| <b>Table S2.</b> Energies of the calculated configuration of <b>1a</b> .....            | 6 |
| <b>Table S3.</b> Energies of the calculated configuration of <b>1b</b> .....            | 7 |
| <b>Fig. S13.</b> The <sup>1</sup> H NMR spectrum of compound <b>2</b> .....             | 8 |
| <b>Fig. S14.</b> The <sup>3</sup> C-DEPT-135 spectrum of compound <b>2</b> .....        | 8 |
| <b>Fig. S15.</b> The <sup>13</sup> C NMR spectrum of compound <b>2</b> .....            | 8 |
| <b>Fig. S16.</b> The HSQC spectrum of compound <b>2</b> .....                           | 9 |
| <b>Fig. S17.</b> The HMBC spectrum of compound <b>2</b> .....                           | 9 |

|                                                                                       |           |
|---------------------------------------------------------------------------------------|-----------|
| <b>Fig. S18.</b> $^1\text{H}$ - $^1\text{H}$ COSY spectrum of compound <b>2</b> ..... | <b>10</b> |
| <b>Fig. S19.</b> The MS-ESI spectrum of compound <b>2</b> .....                       | <b>11</b> |
| <b>Fig. S20.</b> The HRMS-ESI spectrum of compound <b>2</b> .....                     | <b>11</b> |
| <b>Fig. S21.</b> The IR spectrum of compound <b>2</b> .....                           | <b>12</b> |
| <b>Fig. S22.</b> The UV spectrum of compound <b>2</b> .....                           | <b>12</b> |
| <b>Fig. S23.</b> The rotation spectrum of compound <b>2</b> .....                     | <b>12</b> |
| <b>Fig. S24.</b> The $^1\text{H}$ NMR spectrum of compound <b>3</b> .....             | <b>13</b> |
| <b>Fig. S25.</b> The $^{13}\text{C}$ -DEPT-135 spectrum of compound <b>3</b> .....    | <b>13</b> |
| <b>Fig. S26.</b> The $^{13}\text{C}$ NMR spectrum of compound <b>3</b> .....          | <b>13</b> |
| <b>Fig. S27.</b> The HSQC spectrum of compound <b>3</b> .....                         | <b>14</b> |
| <b>Fig. S28.</b> The HMBC spectrum of compound <b>3</b> .....                         | <b>14</b> |
| <b>Fig. S29.</b> $^1\text{H}$ - $^1\text{H}$ COSY spectrum of compound <b>3</b> ..... | <b>15</b> |
| <b>Fig. S30.</b> The MS-ESI spectrum of compound <b>3</b> .....                       | <b>16</b> |
| <b>Fig. S31.</b> The HRMS-ESI spectrum of compound <b>3</b> .....                     | <b>16</b> |
| <b>Fig. S32.</b> The IR spectrum of compound <b>3</b> .....                           | <b>17</b> |
| <b>Fig. S33.</b> The UV spectrum of compound <b>3</b> .....                           | <b>17</b> |
| <b>Fig. S34.</b> The rotation spectrum of compound <b>3</b> .....                     | <b>17</b> |

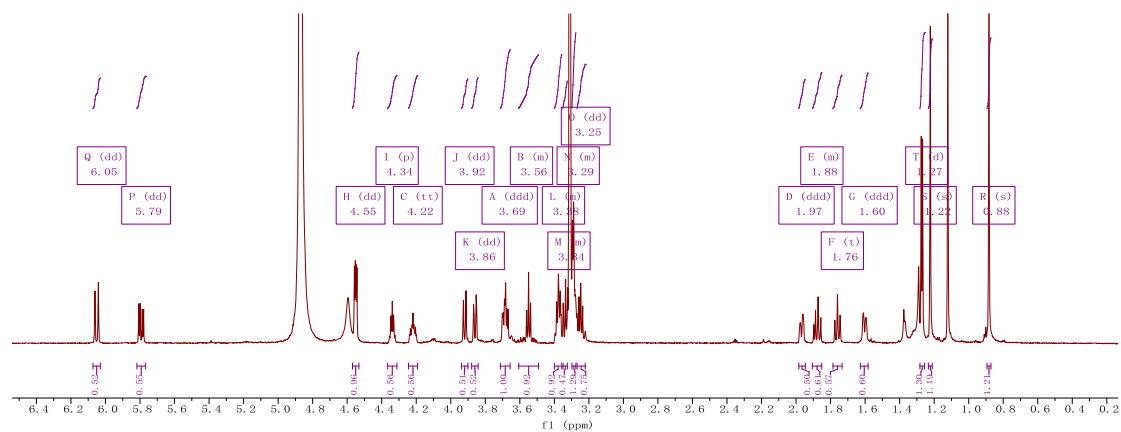

Fig. S1. The  $^1\text{H}$ NMR spectrum (800 MHz,  $\text{CD}_3\text{OD}$ ) of compound **1**.

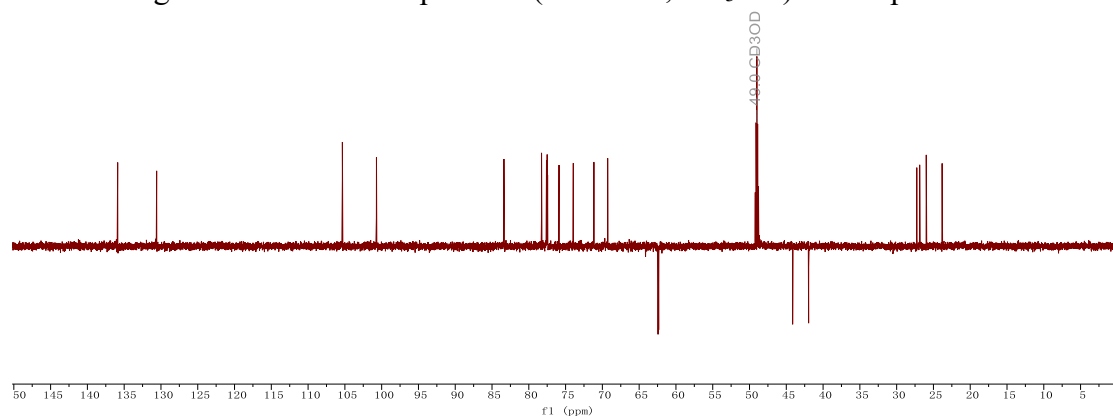

Fig. S2. The  $^{13}\text{C}$ -DEPT-135 spectrum (2000 MHz,  $\text{CD}_3\text{OD}$ ) of compound **1**.

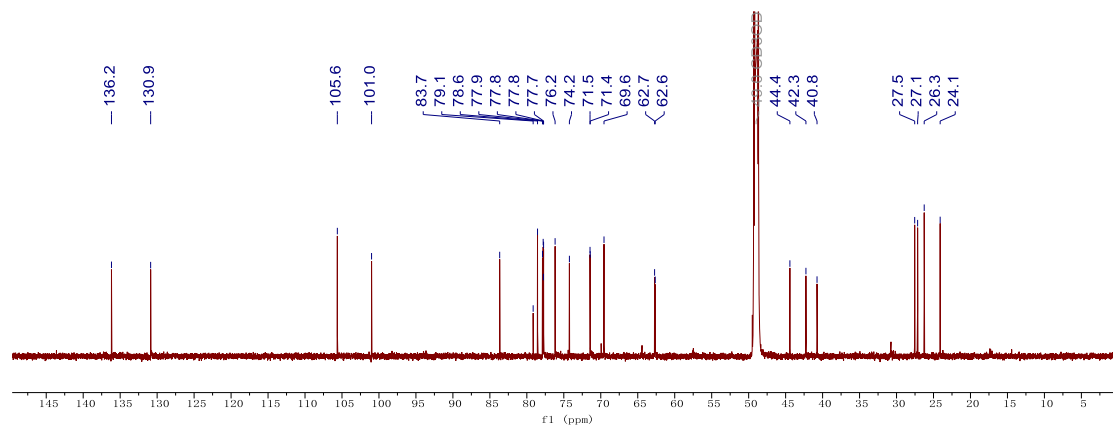

Fig. S3. The  $^{13}\text{C}$  NMR spectrum (200 MHz,  $\text{CD}_3\text{OD}$ ) of compound **1**.

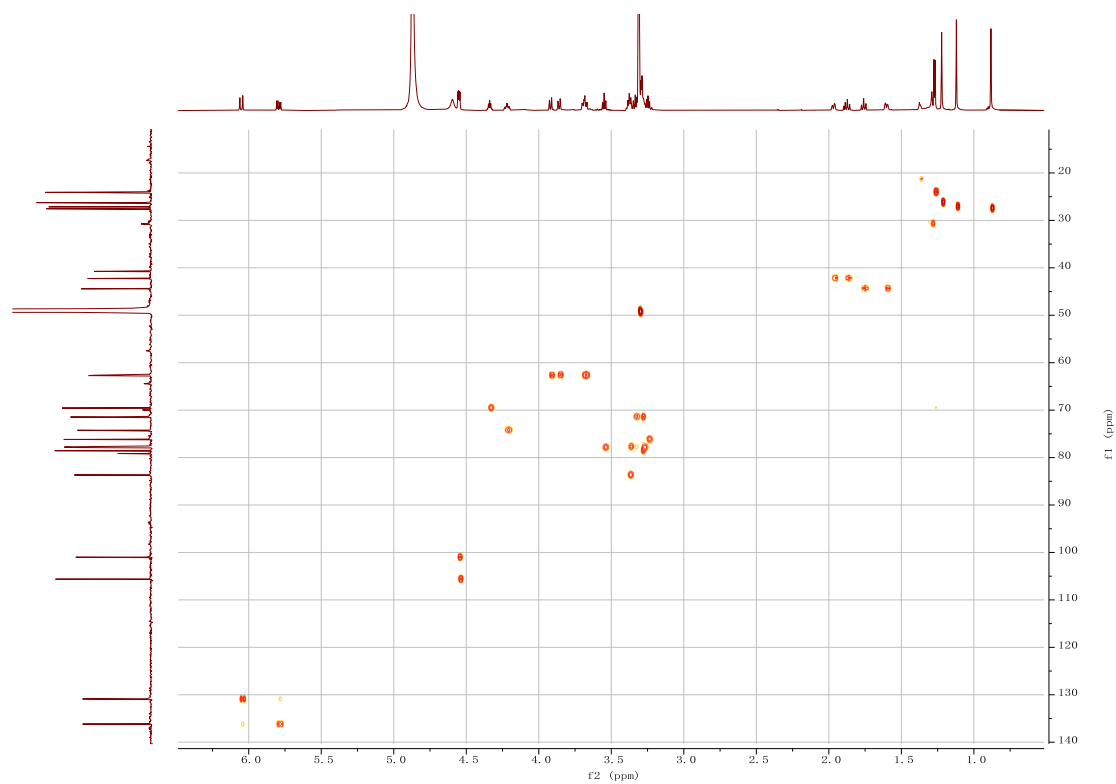

Fig. S4. The HSQC spectrum of compound **1**.

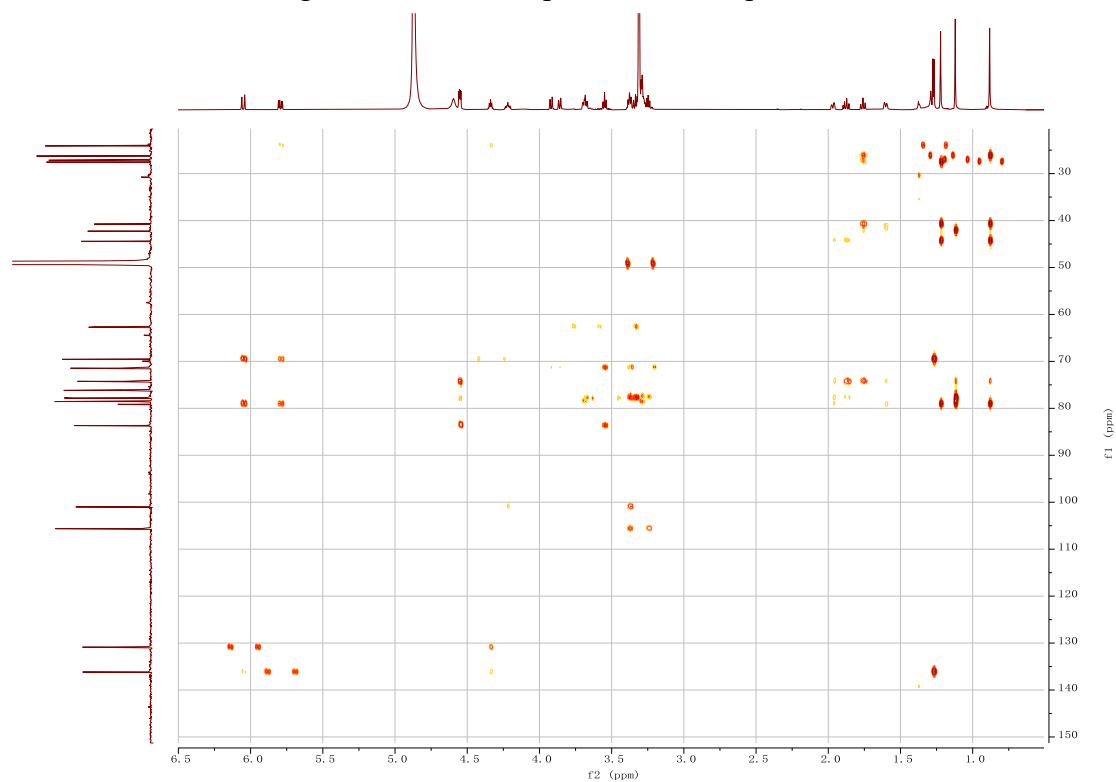

Fig. S5. The HMBC spectrum of compound **1**.

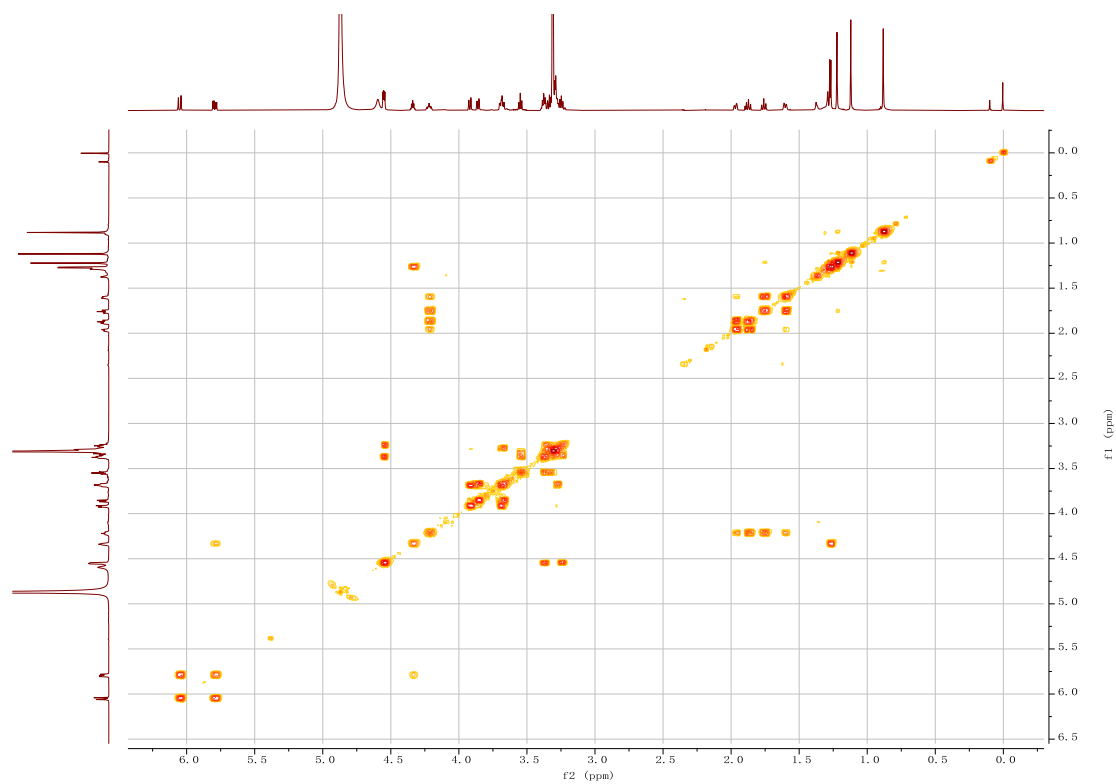

Fig. S6.  $^1\text{H}$ - $^1\text{H}$  COSY spectrum of compound **1**.

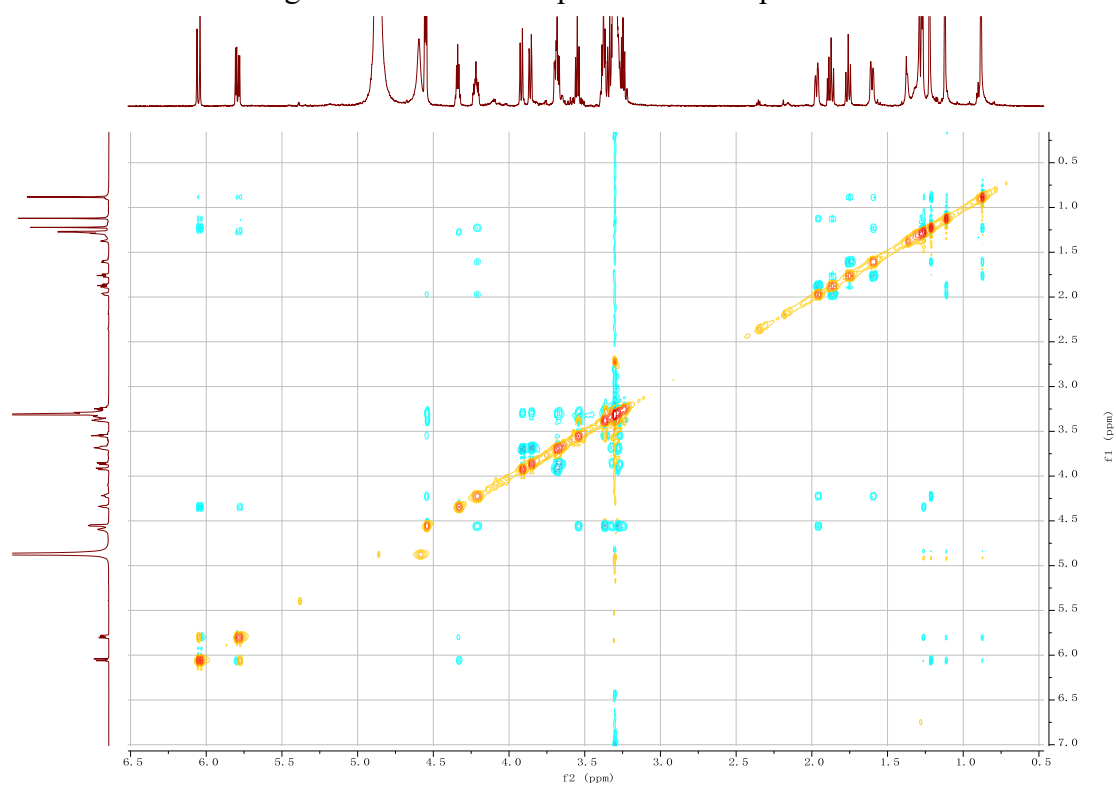

Fig. S7. The NOESY spectrum of compound **1**.

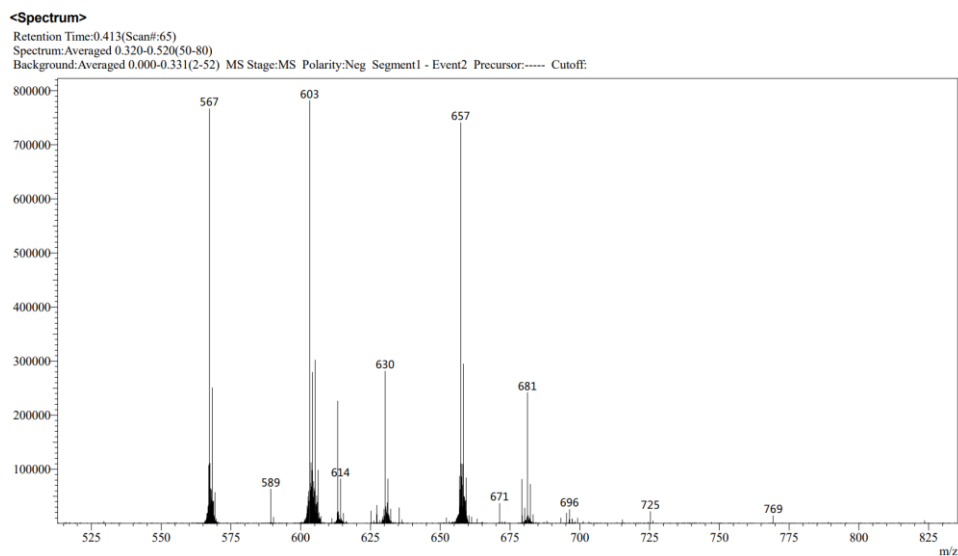

Fig. S8. MS-ESI ( - ) spectrum of compound **1**.

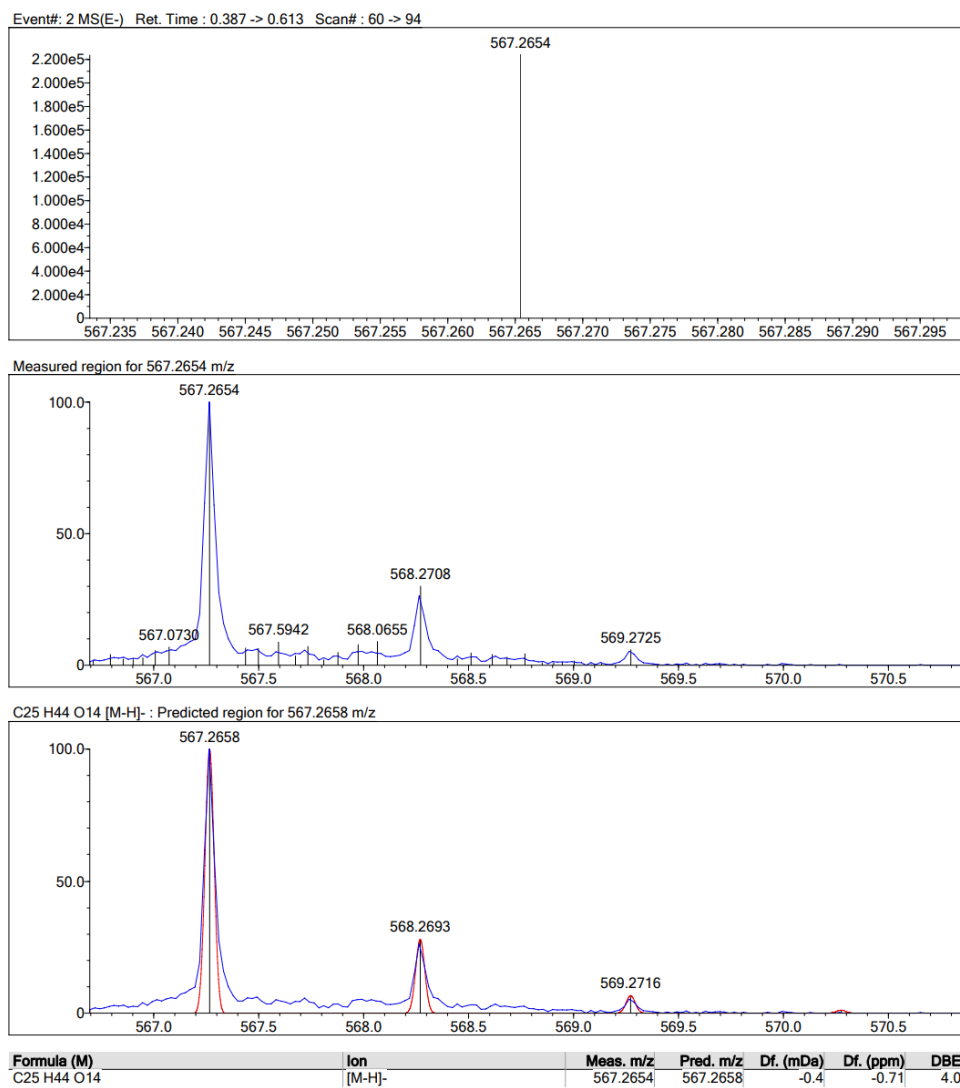

Fig. S9. HRMS-ESI ( - ) spectrum of compound **1**.

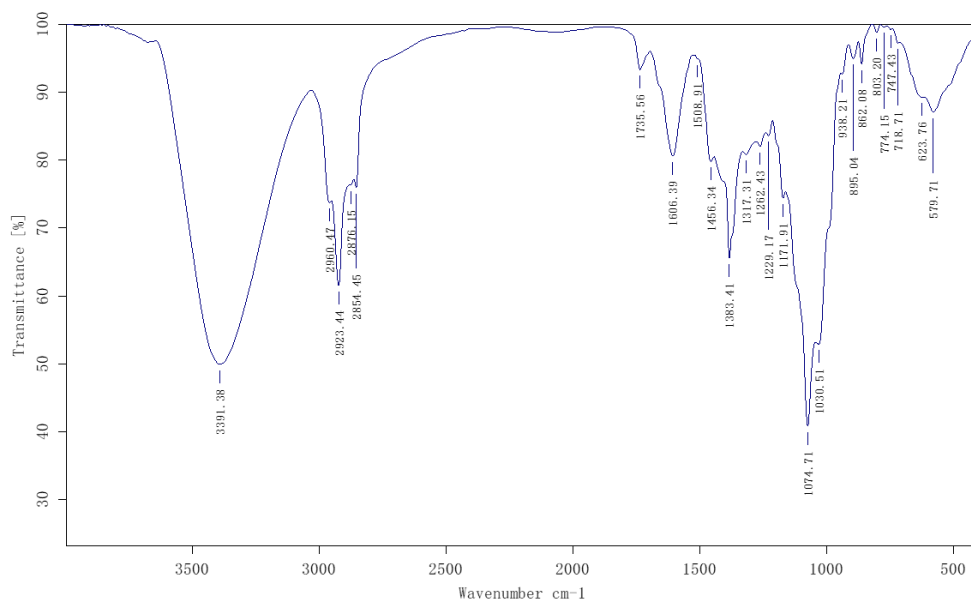

Fig. S10. IR spectrum of compound 1.

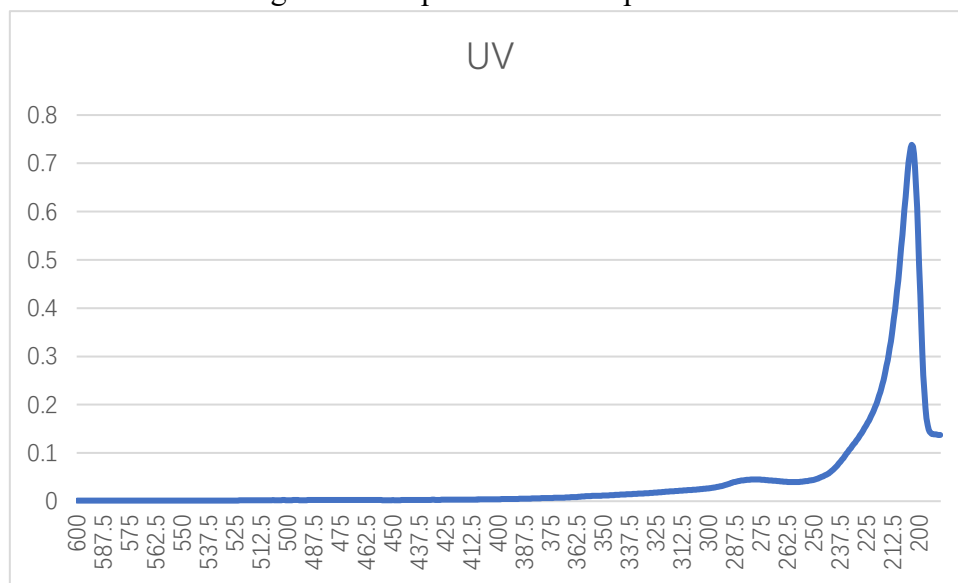

Fig. S11. UV spectrum of compound 1.

#### Rudolph Research Analytical

This sample was measured on an Autopol VI, Serial #91058  
Manufactured by Rudolph Research Analytical, Hackettstown, NJ, USA.

Measurement Date : Friday, 22-JUL-2022

Set Temperature : OFF

Time Delay : Disabled

Delay between Measurement : Disabled

| n | Average | Std.Dev. | % RSD | Maximum | Minimum |
|---|---------|----------|-------|---------|---------|
| 5 | -26.70  | 0.23     | -0.86 | -26.50  | -27.10  |

| S.No | Sample ID | Time        | Result | Scale | OR °Arc | WLG.nm | Lq.mm  | Conc.g/100ml | Temp. |
|------|-----------|-------------|--------|-------|---------|--------|--------|--------------|-------|
| 1    | ZL-3      | 01:59:44 PM | -27.10 | SR    | -0.0271 | 589    | 100.00 | 0.100        | 25.4  |
| 2    | ZL-3      | 01:59:52 PM | -26.70 | SR    | -0.0267 | 589    | 100.00 | 0.100        | 25.5  |
| 3    | ZL-3      | 02:00:01 PM | -26.60 | SR    | -0.0266 | 589    | 100.00 | 0.100        | 25.4  |
| 4    | ZL-3      | 02:00:09 PM | -26.50 | SR    | -0.0265 | 589    | 100.00 | 0.100        | 25.4  |
| 5    | ZL-3      | 02:00:17 PM | -26.60 | SR    | -0.0266 | 589    | 100.00 | 0.100        | 25.4  |

Fig. S12. Rotation spectrum of compound 1.

**Table S1** Statistics of Ordinary Least Squares (OLS) Linear Regression of experimental and computed  $^{13}\text{C}$ -NMR chemical shifts.

| Configuration | DP4+ probability (%) | $R^2$  | RMSE |
|---------------|----------------------|--------|------|
| <b>1a</b>     | 99.96                | 0.9904 | 3.13 |
| <b>1b</b>     | 0.04                 | 0.9861 | 3.63 |

### Energies at M062X/6-31G(d) theory level

Energies of the calculated configuration of **1a**.

**Table S2** Energies and populations of conformers of the calculated configuration.

| Conformer | Population (%) | E (Hartree)  |
|-----------|----------------|--------------|
| <b>1</b>  | 1.47           | -2031.385069 |
| <b>6</b>  | 44.86          | -2031.388295 |
| <b>12</b> | 5.14           | -2031.386251 |
| <b>18</b> | 45.94          | -2031.388317 |
| <b>19</b> | 1.35           | -2031.384992 |
| <b>21</b> | 1.24           | -2031.384912 |



Energies of the calculated configuration of **1b**.

**Table S3** Energies and populations of conformers of the calculated configuration.

| Conformer  | Population (%) | E (Hartree)  |
|------------|----------------|--------------|
| <b>1</b>   | 3.87           | -2031.387785 |
| <b>2</b>   | 5.2            | -2031.388062 |
| <b>3</b>   | 5.49           | -2031.388113 |
| <b>4</b>   | 6.49           | -2031.388271 |
| <b>5</b>   | 3.18           | -2031.3876   |
| <b>6</b>   | 4.53           | -2031.387933 |
| <b>7</b>   | 7.1            | -2031.388357 |
| <b>8</b>   | 3.44           | -2031.387673 |
| <b>9</b>   | 1.13           | -2031.386623 |
| <b>10</b>  | 1.55           | -2031.386921 |
| <b>11</b>  | 2.17           | -2031.387239 |
| <b>12</b>  | 4.15           | -2031.387849 |
| <b>17</b>  | 1.24           | -2031.386711 |
| <b>20</b>  | 3.05           | -2031.387559 |
| <b>22</b>  | 1.18           | -2031.386662 |
| <b>24</b>  | 5.55           | -2031.388125 |
| <b>25</b>  | 4.84           | -2031.387995 |
| <b>53</b>  | 1.58           | -2031.386941 |
| <b>62</b>  | 1.98           | -2031.387152 |
| <b>66</b>  | 2              | -2031.387161 |
| <b>90</b>  | 3.15           | -2031.38759  |
| <b>92</b>  | 4.61           | -2031.387949 |
| <b>94</b>  | 3.87           | -2031.387784 |
| <b>116</b> | 5.94           | -2031.388188 |
| <b>120</b> | 5.65           | -2031.388141 |
| <b>122</b> | 7.07           | -2031.388352 |

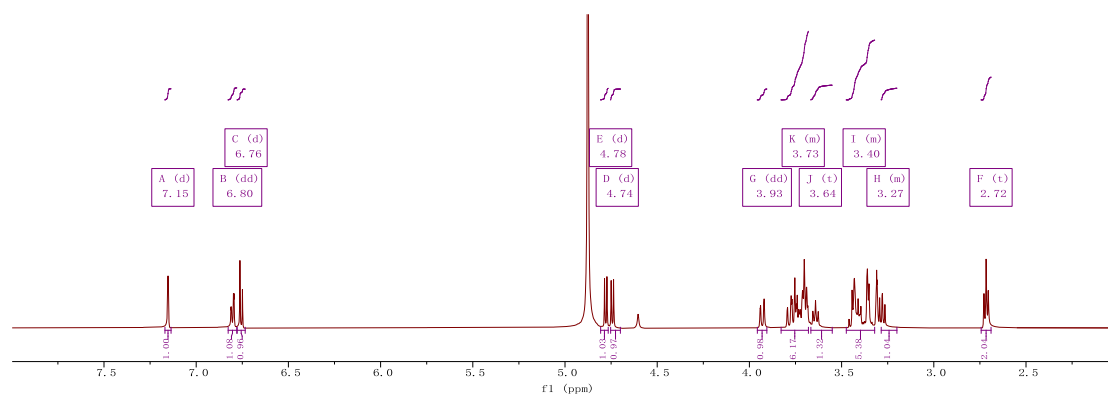

Fig. S13. The <sup>1</sup>H NMR spectrum (600 MHz, CD<sub>3</sub>OD) of compound **2**.

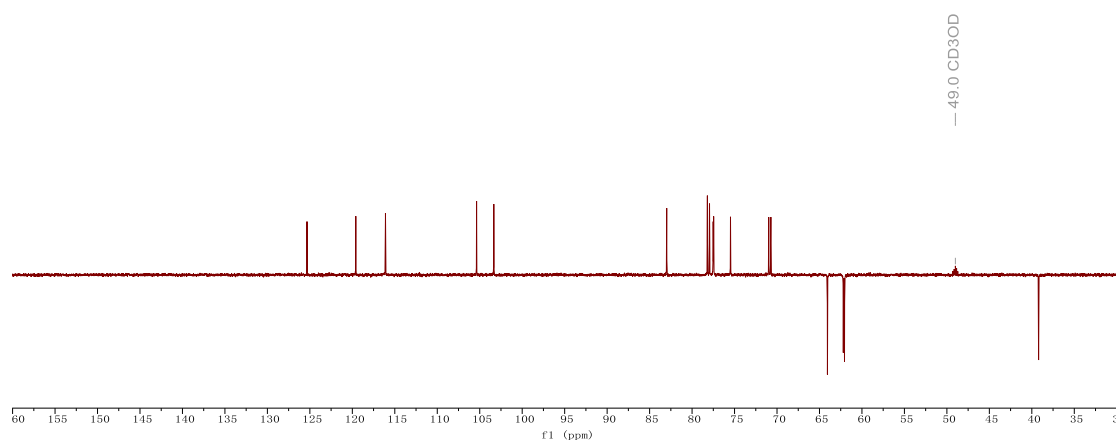

Fig. S14. The <sup>13</sup>C-DEPT-135 spectrum (150 MHz, CD<sub>3</sub>OD) of compound **2**.

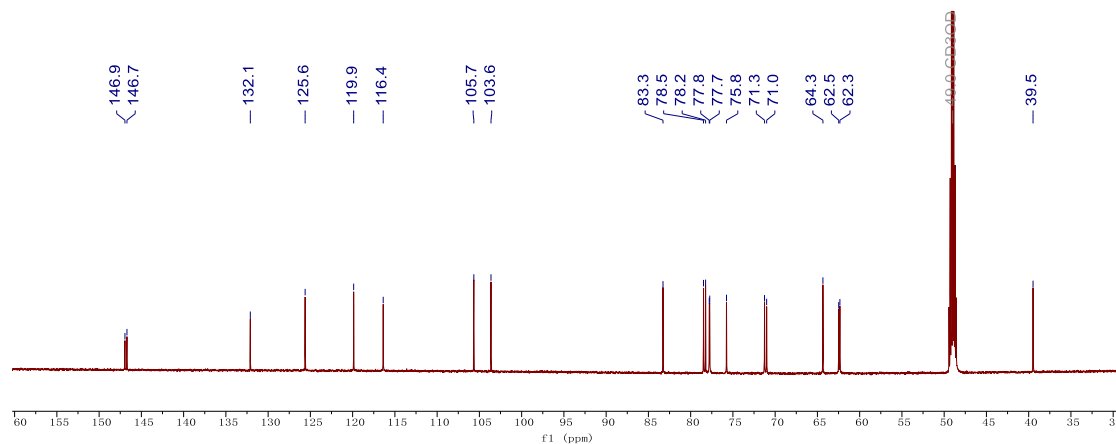

Fig. S15. The <sup>13</sup>C NMR spectrum (150 MHz, CD<sub>3</sub>OD) of compound **2**.

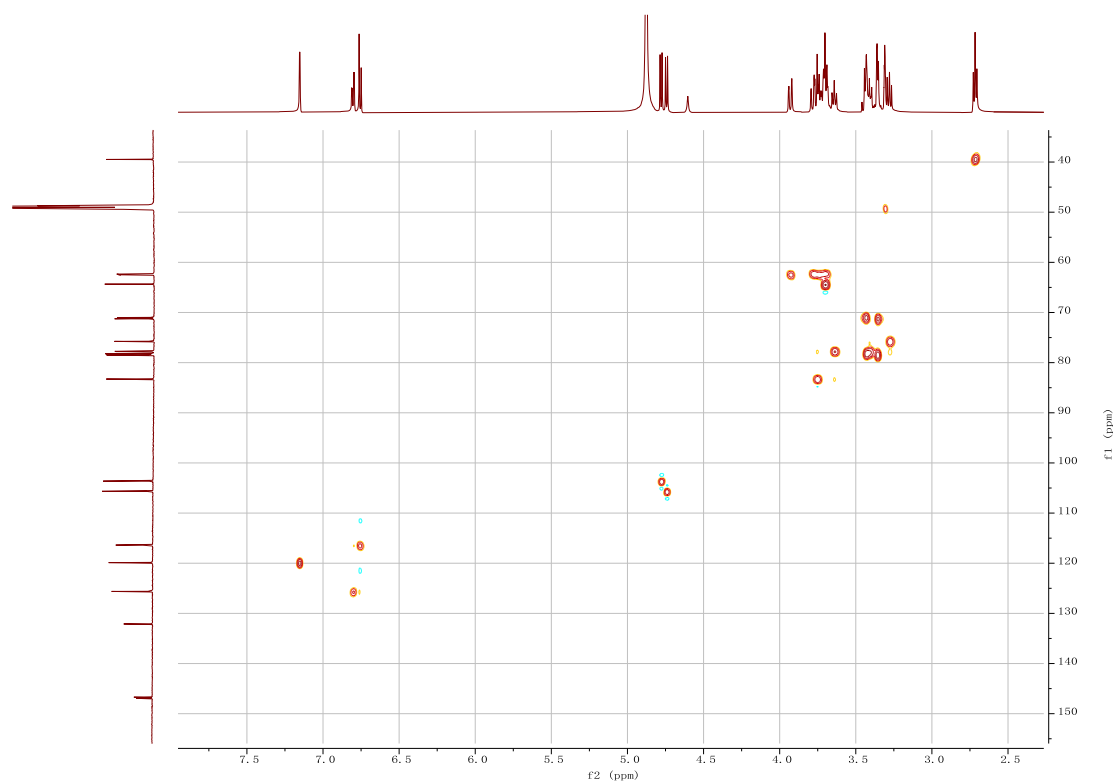

Fig. S16. The HSQC spectrum of compound **2**.

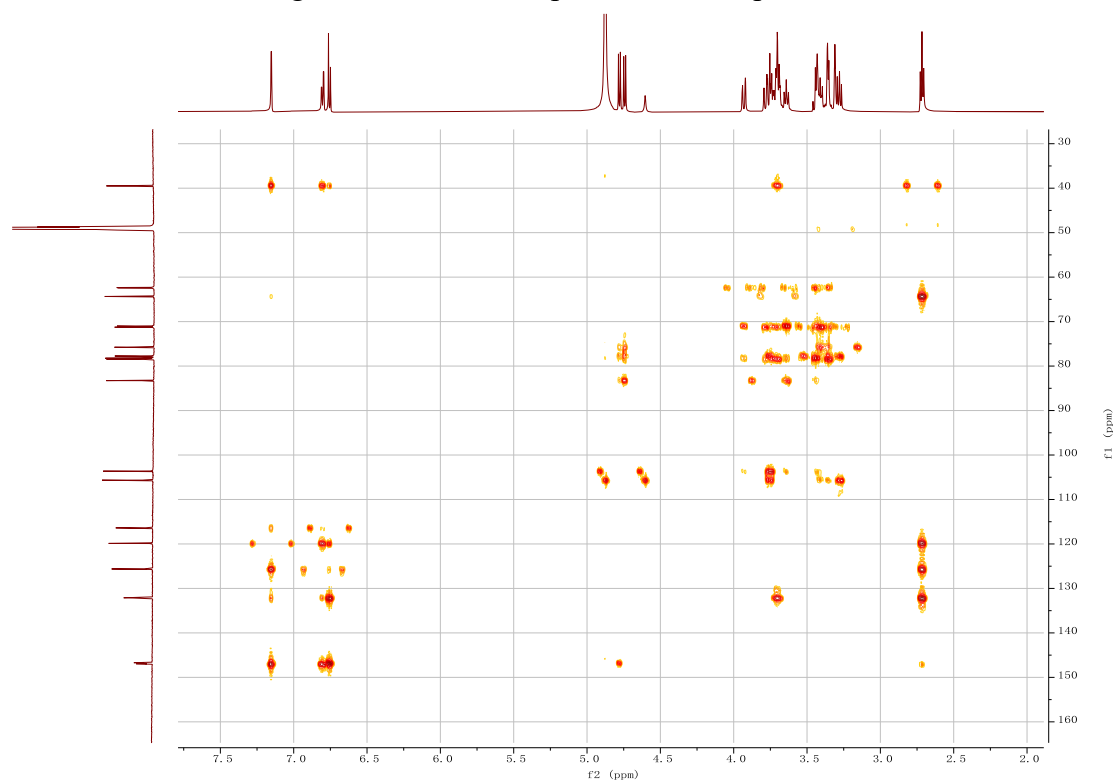

Fig. S17. The HMBC spectrum of compound **2**.

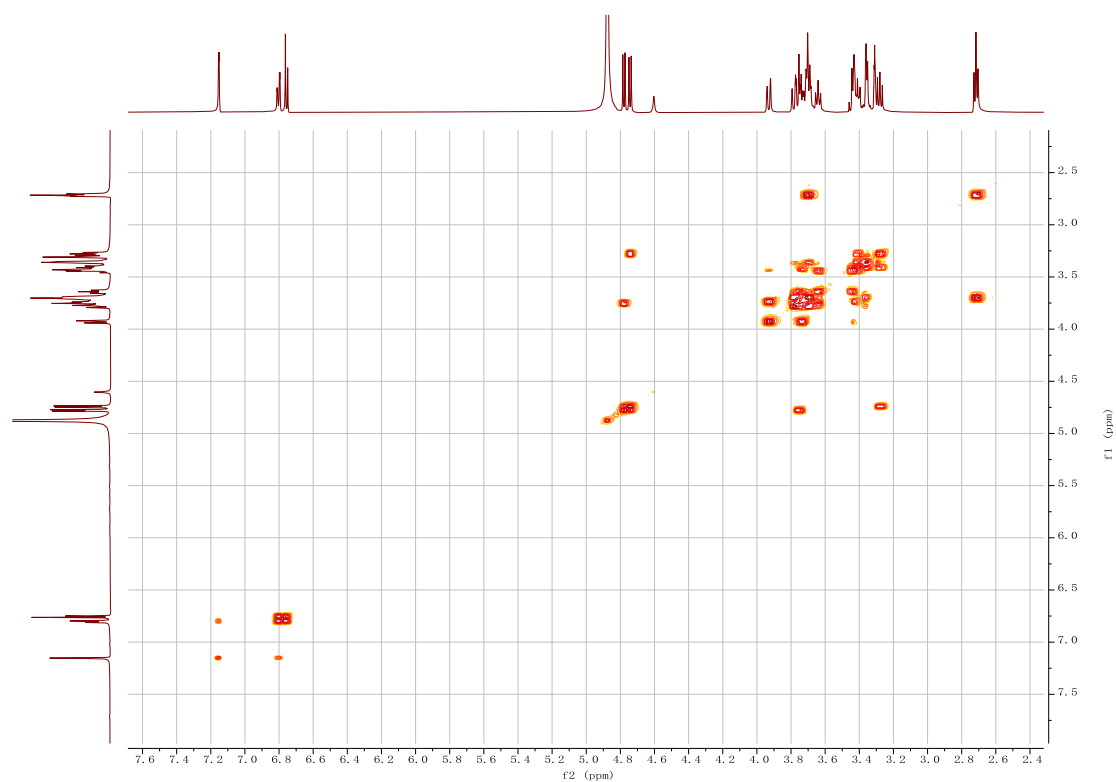

Fig. S18.  $^1\text{H}$ - $^1\text{H}$  COSY spectrum of compound **2**.

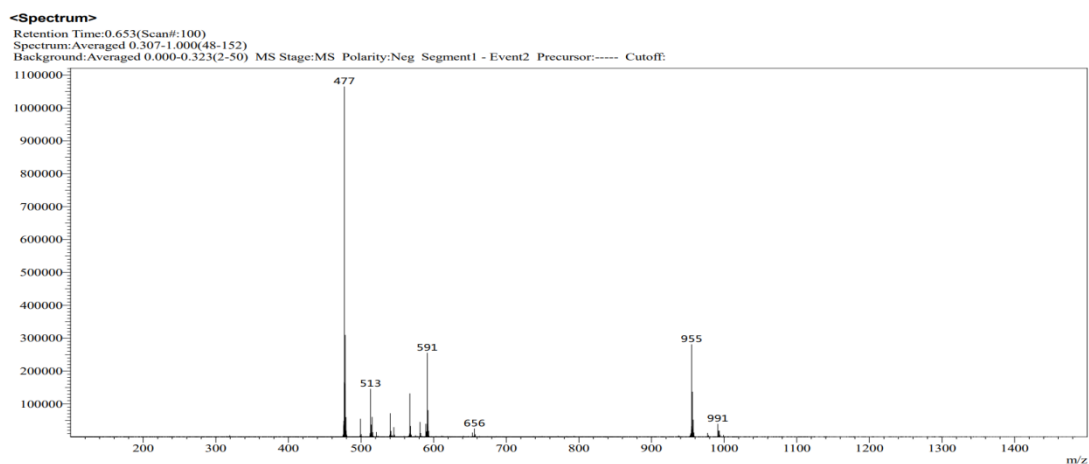

Fig. S19. MS-ESI ( - ) spectrum of compound **2**.

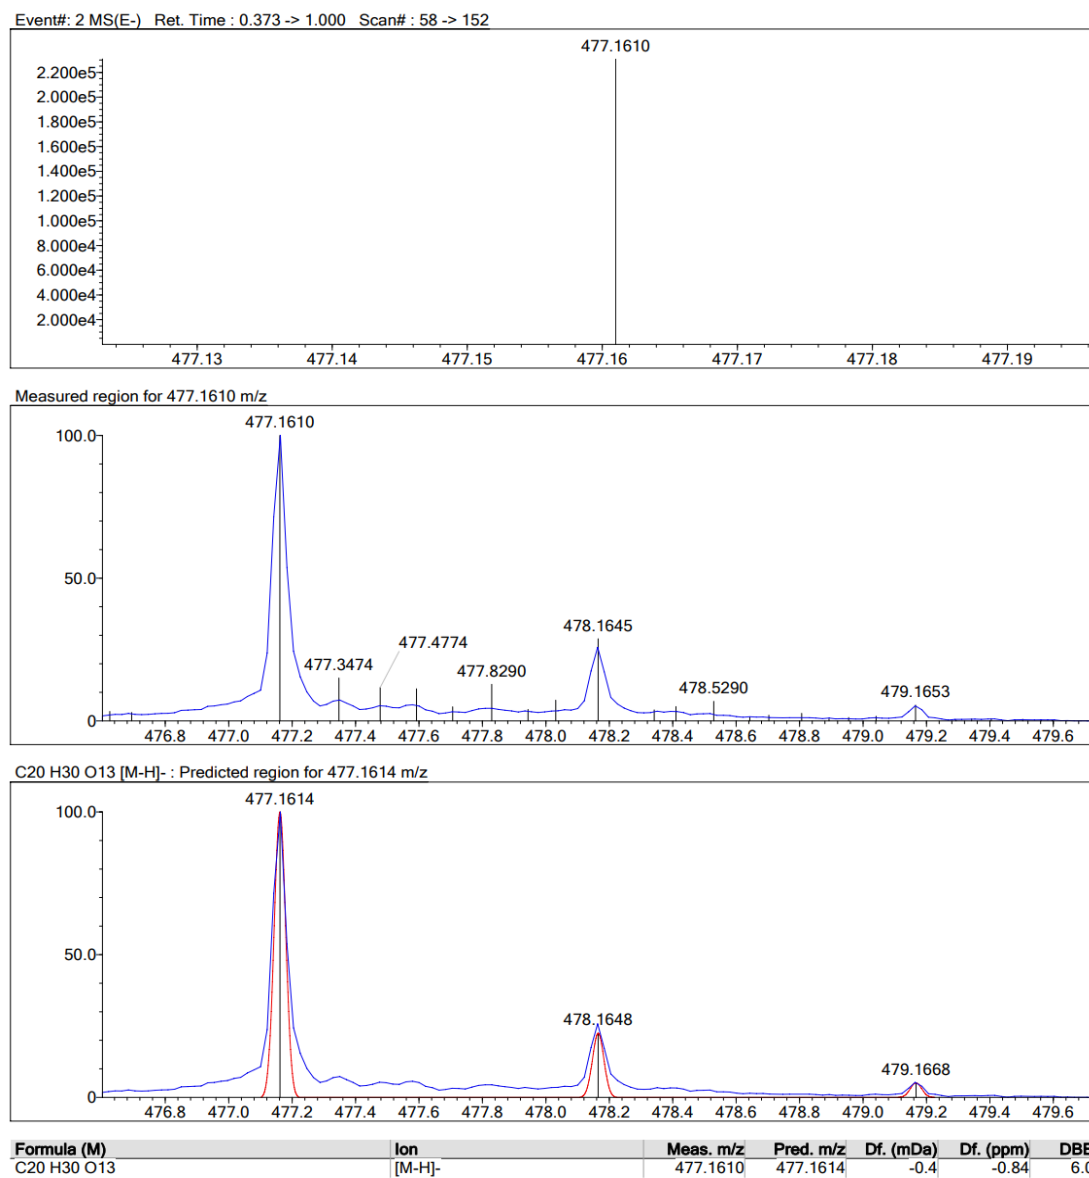

Fig. S20. HRMS-ESI ( - ) spectrum of compound **2**.

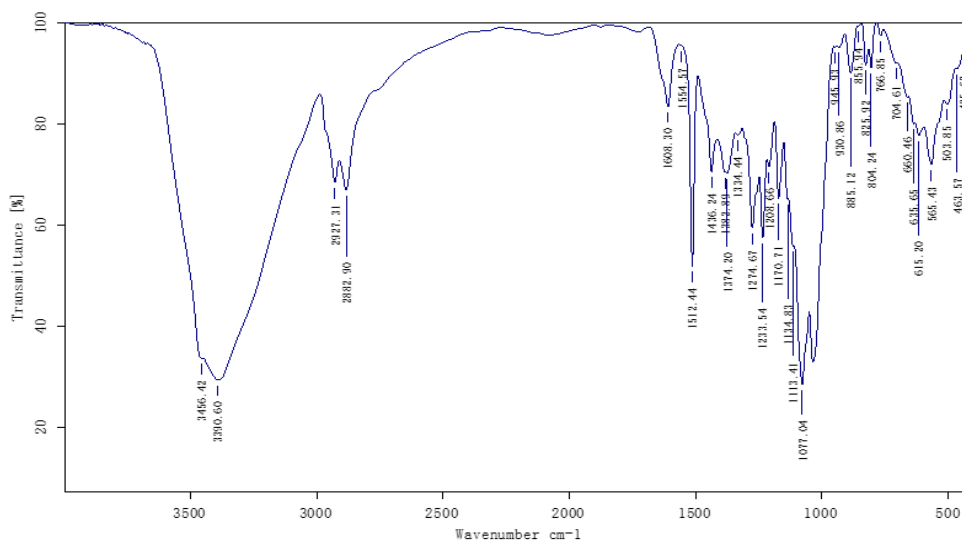

Fig. S21. IR spectrum of compound 2.

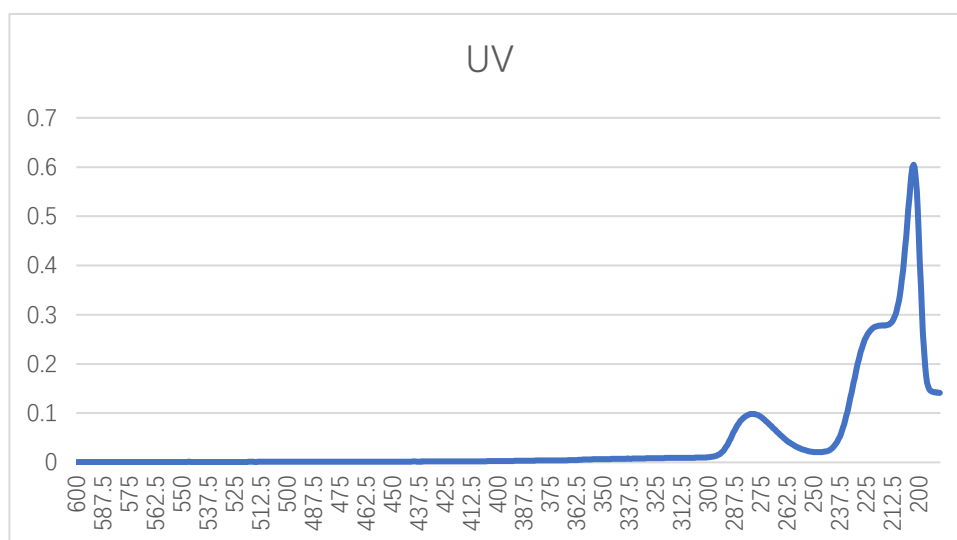

Fig. S22. UV spectrum of compound 2.

### Rudolph Research Analytical

This sample was measured on an Autopol VI, Serial #91058  
Manufactured by Rudolph Research Analytical, Hackettstown, NJ, USA.

Measurement Date : Friday, 22-JUL-2022

Set Temperature : OFF

Time Delay : Disabled

Delay between Measurement : Disabled

| <u>n</u>    | <u>Average</u>   | <u>Std.Dev.</u> | <u>% RSD</u>  | <u>Maximum</u> | <u>Minimum</u> |               |              |                     |              |
|-------------|------------------|-----------------|---------------|----------------|----------------|---------------|--------------|---------------------|--------------|
| 5           | -1.20            | 0.10            | -8.33         | -1.07          | -1.27          |               |              |                     |              |
| <u>S.No</u> | <u>Sample ID</u> | <u>Time</u>     | <u>Result</u> | <u>Scale</u>   | <u>OR °Arc</u> | <u>WLg.nm</u> | <u>Lg.mm</u> | <u>Conc.g/100ml</u> | <u>Temp.</u> |
| 1           | ZL-5             | 02:06:13 PM     | -1.27         | SR             | -0.0038        | 589           | 100.00       | 0.300               | 25.5         |
| 2           | ZL-5             | 02:06:21 PM     | -1.27         | SR             | -0.0038        | 589           | 100.00       | 0.300               | 25.5         |
| 3           | ZL-5             | 02:06:30 PM     | -1.27         | SR             | -0.0038        | 589           | 100.00       | 0.300               | 25.5         |
| 4           | ZL-5             | 02:06:38 PM     | -1.07         | SR             | -0.0032        | 589           | 100.00       | 0.300               | 25.5         |
| 5           | ZL-5             | 02:06:46 PM     | -1.10         | SR             | -0.0033        | 589           | 100.00       | 0.300               | 25.5         |

Fig. S23. Rotation spectrum of compound 2.

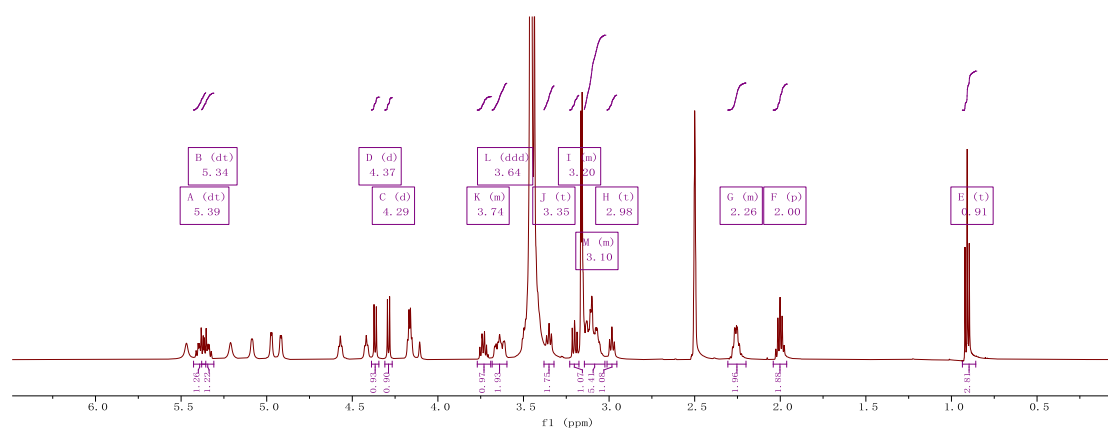

Fig. S24. The  $^1\text{H}$ NMR spectrum (600 MHz,  $\text{CD}_3\text{OD}$ ) of compound **3**.

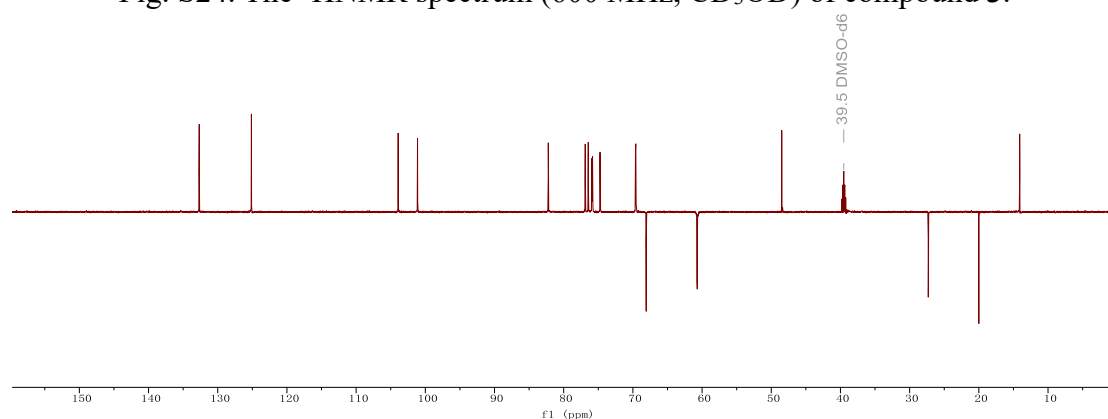

Fig. S25. The  $^{13}\text{C}$ -DEPT-135 spectrum (150 MHz,  $\text{CD}_3\text{OD}$ ) of compound **3**.

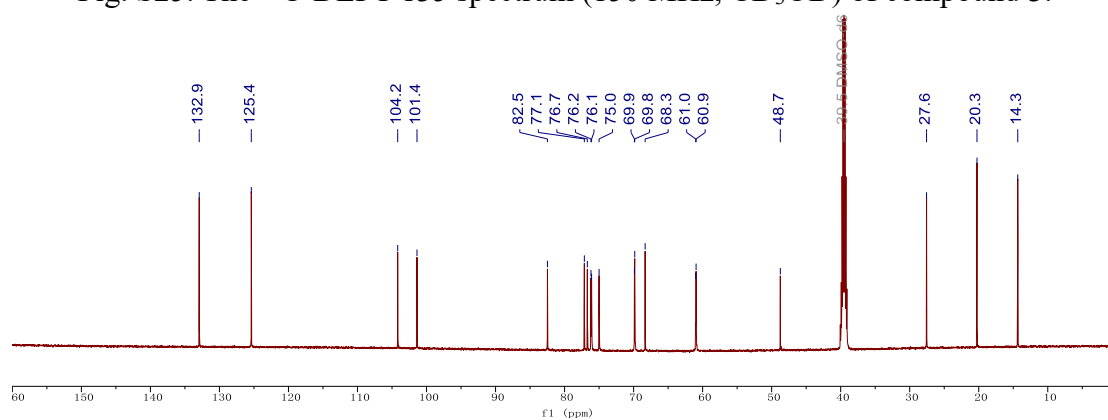

Fig. S26. The  $^{13}\text{C}$  NMR spectrum (150 MHz,  $\text{CD}_3\text{OD}$ ) of compound **3**.

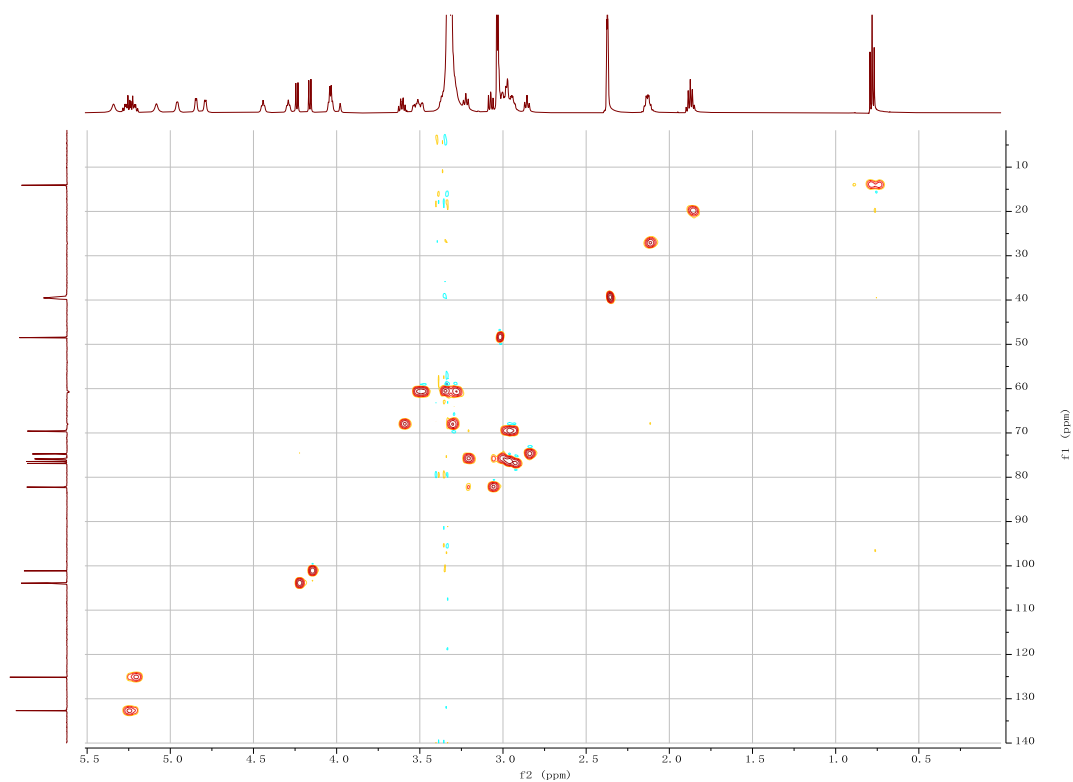

Fig. S27 The HSQC spectrum of compound **3**.

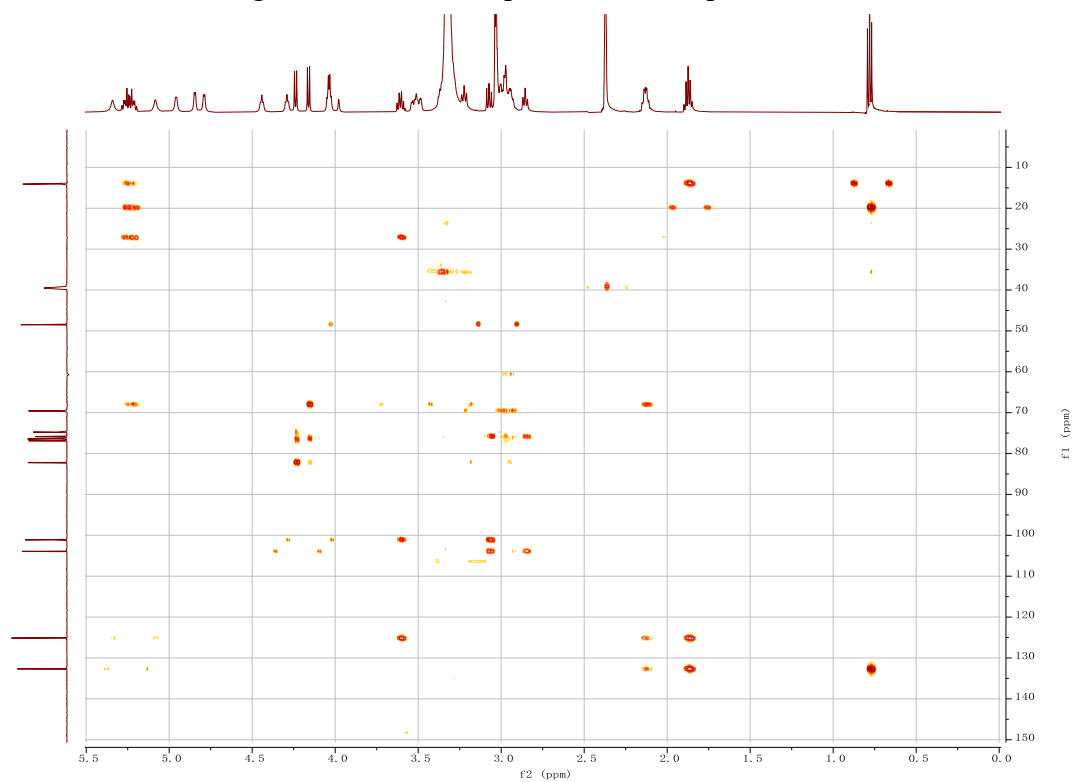

Fig. S28. The HMBC spectrum of compound **3**.



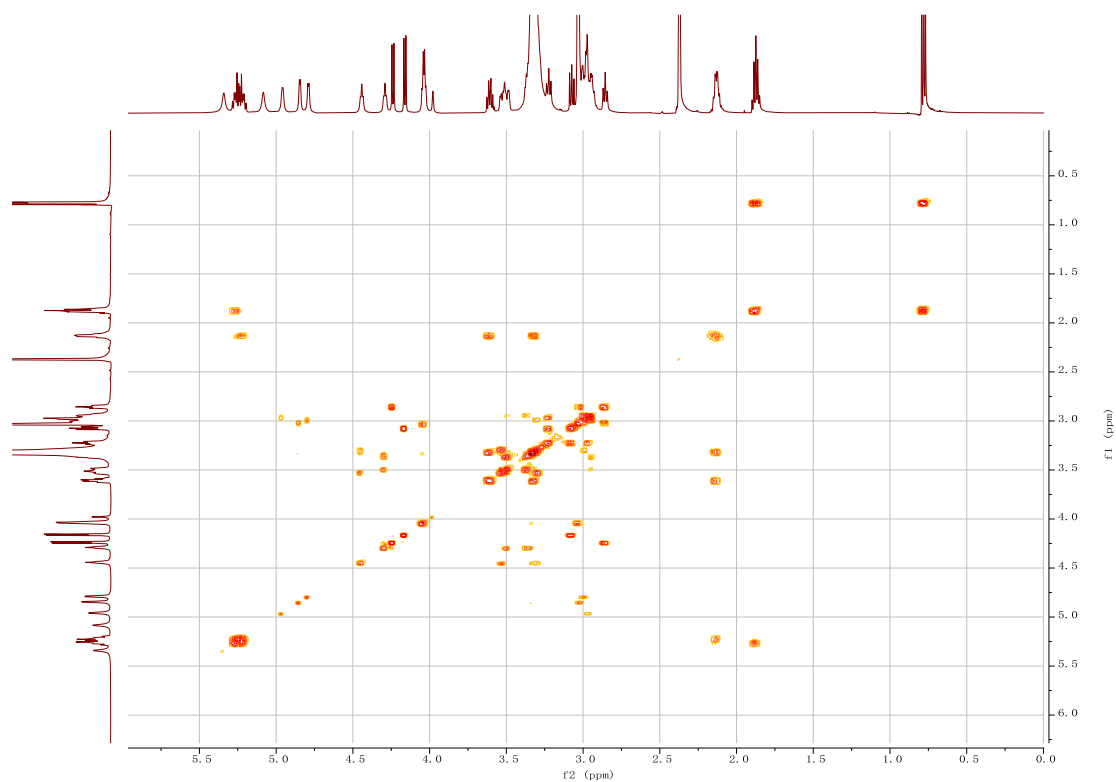

Fig. S29.  $^1\text{H}$ - $^1\text{H}$  COSY spectrum of compound **3**.

<Spectrum>

Retention Time: 0.493 (Scan#: 76)  
Spectrum: Averaged 0.320-0.667 (50-102)  
Background: Averaged 0.000-0.303 (2-48) MS Stage: MS Polarity: Neg Segment1 - Event2 Precursor: ----- Cutoff:

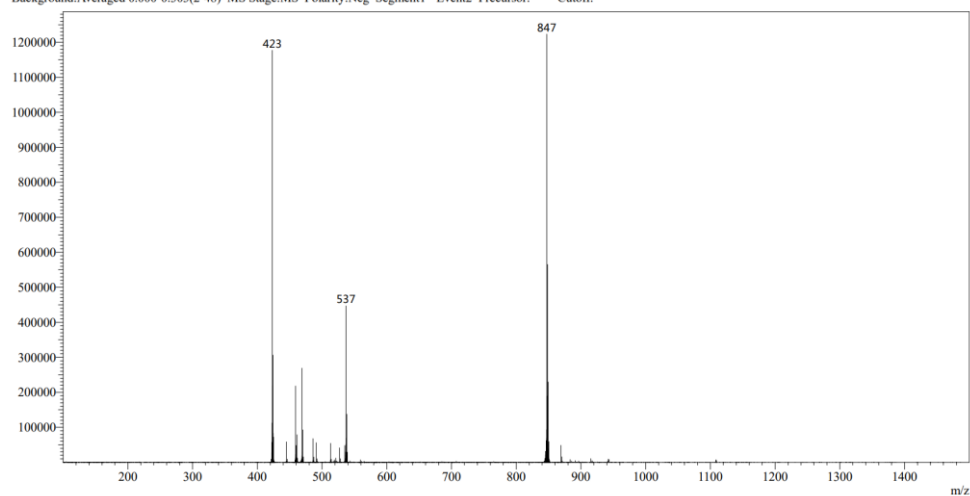

Fig. S30. MS-ESI ( - ) spectrum of compound **3**.

Event#: 2 MS(E-) Ret. Time : 0.267 -> 0.600 Scan#: 42 -> 92

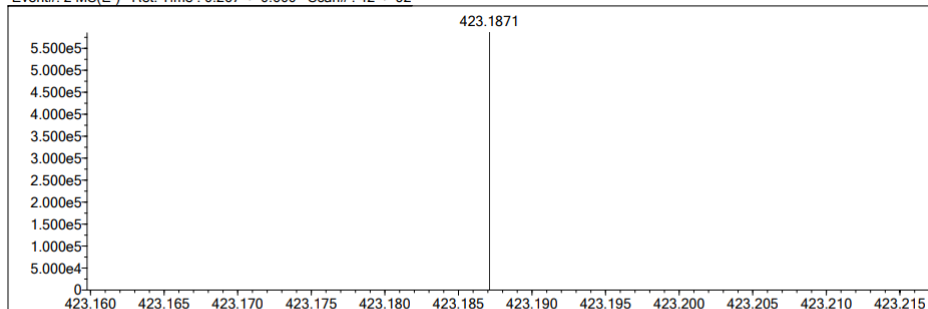

Measured region for 423.1871 m/z

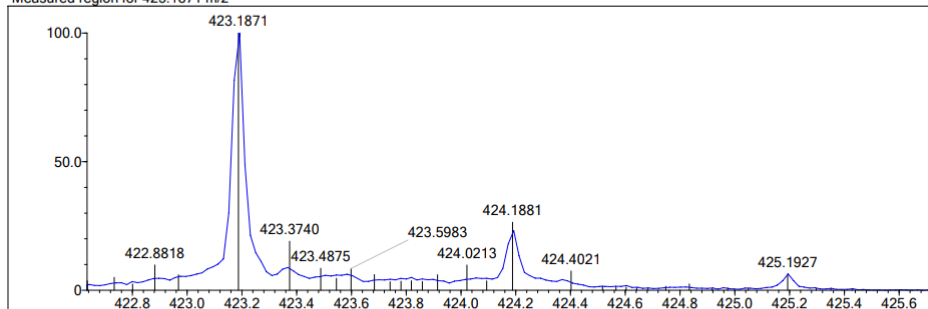

C18 H32 O11 [M-H]- : Predicted region for 423.1872 m/z

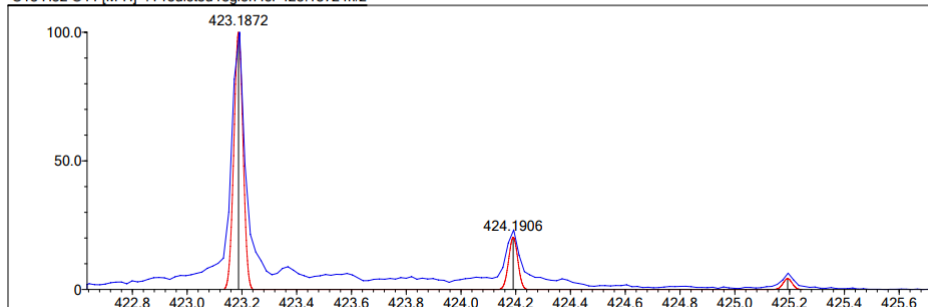

| Formula (M) | Ion    | Meas. m/z | Pred. m/z | Df. (mDa) | Df. (ppm) | DBE |
|-------------|--------|-----------|-----------|-----------|-----------|-----|
| C18 H32 O11 | [M-H]- | 423.1871  | 423.1872  | -0.1      | -0.24     | 3.0 |

Fig. S31. HRMS-ESI ( - ) spectrum of compound **3**.

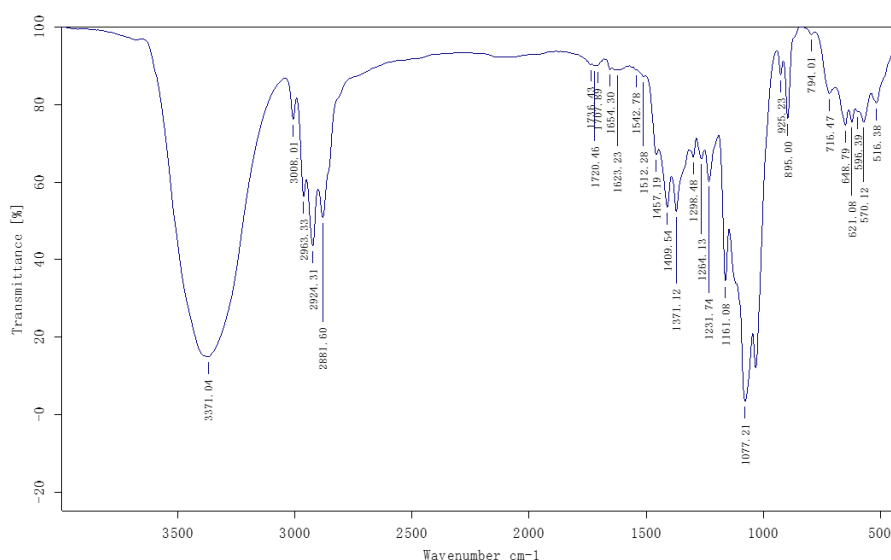

Fig..S32. IR spectrum of compound 3.

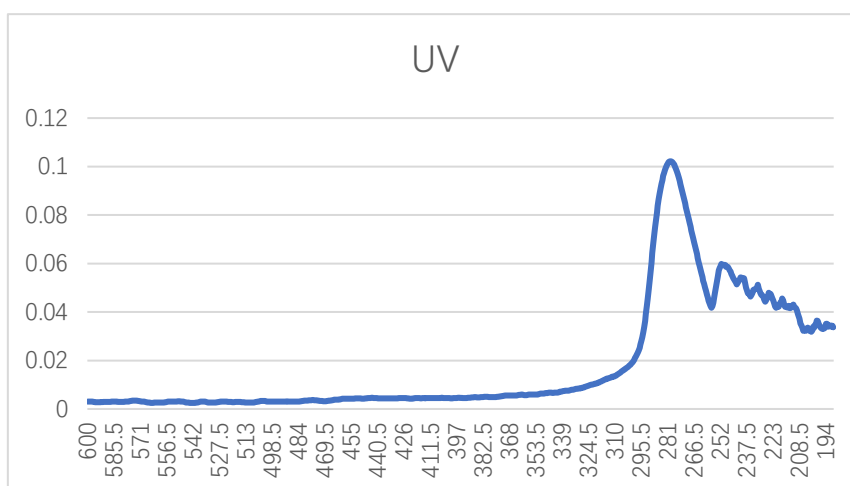

Fig. S33. UV spectrum of compound 3.

#### **Rudolph Research Analytical**

This sample was measured on an Autopol VI, Serial #91058  
Manufactured by Rudolph Research Analytical, Hackettstown, NJ, USA.

Measurement Date : Friday, 22-JUL-2022

Set Temperature : OFF

Time Delay : Disabled

Delay between Measurement : Disabled

| <u>n</u>    | <u>Average</u>   | <u>Std.Dev.</u> | <u>% RSD</u>  | <u>Maximum</u> | <u>Minimum</u> |               |              |                     |              |
|-------------|------------------|-----------------|---------------|----------------|----------------|---------------|--------------|---------------------|--------------|
| 5           | -14.22           | 0.13            | -0.91         | -14.06         | -14.36         |               |              |                     |              |
| <u>S.No</u> | <u>Sample ID</u> | <u>Time</u>     | <u>Result</u> | <u>Scale</u>   | <u>OR °Arc</u> | <u>WLG.nm</u> | <u>Lg.mm</u> | <u>Conc.g/100ml</u> | <u>Temp.</u> |
| 1           | ZL-2             | 01:28:22 PM     | -14.06        | SR             | -0.1406        | 589           | 100.00       | 1.000               | 24.6         |
| 2           | ZL-2             | 01:28:30 PM     | -14.13        | SR             | -0.1413        | 589           | 100.00       | 1.000               | 24.6         |
| 3           | ZL-2             | 01:28:38 PM     | -14.36        | SR             | -0.1436        | 589           | 100.00       | 1.000               | 24.6         |
| 4           | ZL-2             | 01:28:55 PM     | -14.33        | SR             | -0.1433        | 589           | 100.00       | 1.000               | 24.6         |
| 5           | ZL-2             | 01:29:04 PM     | -14.21        | SR             | -0.1421        | 589           | 100.00       | 1.000               | 24.7         |

Fig. S34. Rotation spectrum of compound 3.
